# Supplementary material for: Preparation and RGB upconversion optic properties of transparent anti-counterfeiting films
Source: Royal Society of Chemistry journal article supplement (doi:10.1039/c7nr05744j), 2017-01-01
Supplement: c7nr05744j1.pdf [file c7nr05744j1.pdf]

## Supporting Information

# Preparation and RGB Upconversion Optic Properties of Transparent Anti-Counterfeiting Films

*Weijing Yao<sup>1#</sup>, Qingyong Tian<sup>1#</sup>, Jun Liu<sup>1</sup>, Qingwen Xue<sup>1</sup>, Mengxiao Li<sup>1</sup>, Li Liu<sup>1</sup>, Qiang Lu<sup>1</sup>,*

*Wei Wu<sup>1,\*</sup>*

<sup>1</sup> Laboratory of Printable Functional Nanomaterials and Printed Electronics, School of  
Printing and Packaging, Wuhan University, Wuhan 430072, P. R. China

# These authors contributed equally.

---

\*To whom correspondence should be addressed. Tel: +86-27-68778529. Fax: +86-27-68778433. E-

mail: [weiwu@whu.edu.cn](mailto:weiwu@whu.edu.cn) (W. Wu)

**Table S1** Different mass ratio of UCMPs-B inks and corresponding experimental parameters of viscosity test.

| Proportion |                |              |                  | Viscosity test |                                                |                                  |                                  |                     |
|------------|----------------|--------------|------------------|----------------|------------------------------------------------|----------------------------------|----------------------------------|---------------------|
| Sample     | UCMPs<br>(wt%) | PAA<br>(wt%) | Ethanol<br>(wt%) | t<br>(s)       | <i>k</i><br>(mm <sup>2</sup> /s <sup>2</sup> ) | <i>v</i><br>(mm <sup>2</sup> /s) | <i>ρ</i><br>(g/cm <sup>3</sup> ) | <i>η</i><br>(mPa·s) |
| S1         | 5              | 25           | 70               | 136            | 0.08987                                        | 12.222                           | 0.897                            | 10.963              |
| S2         | 5              | 30           | 65               | 266            | 0.08987                                        | 23.905                           | 0.932                            | 22.280              |
| S3         | 5              | 35           | 60               | 606            | 0.08987                                        | 54.461                           | 0.962                            | 52.392              |
| S4         | 5              | 40           | 55               | 1196           | 0.08987                                        | 107.485                          | 0.990                            | 106.410             |
| S5         | 5              | 45           | 50               | 2923           | 0.08987                                        | 262.690                          | 1.021                            | 268.206             |
| S6         | 5              | 43           | 52               | 2076           | 0.08987                                        | 186.570                          | 1.005                            | 187.503             |

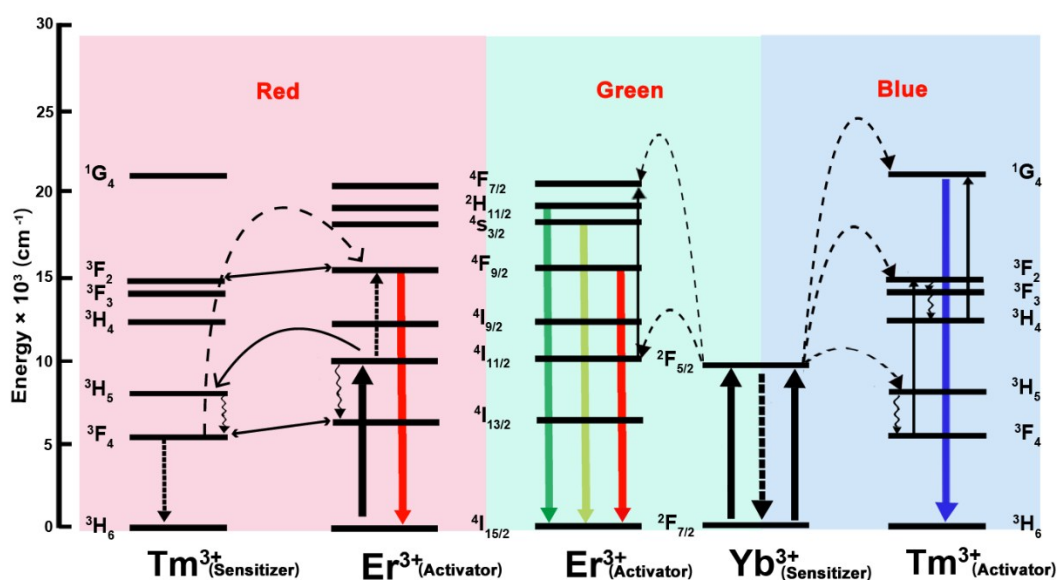

**Figure S1** Energy level diagrams of the Tm<sup>3+</sup>, Er<sup>3+</sup> and Yb<sup>3+</sup> illustrating the upconversion mechanisms under 980 nm irradiation.

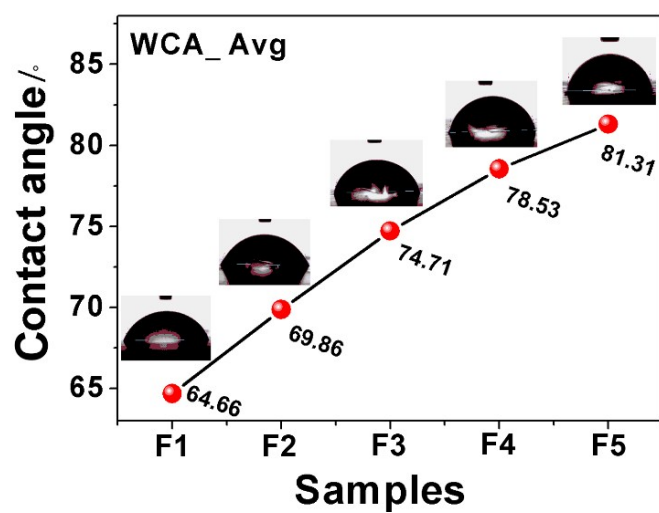

**Figure S2** Water contact angle of UCMPs-B/PAA F1-F5 films.

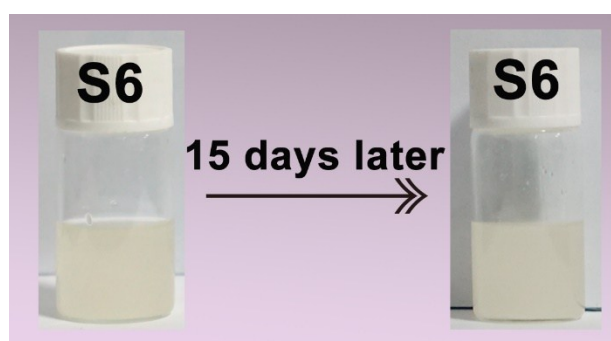

**Figure S3** Photographs of UCMPs inks at the optimal parameter (5:43:52) settled in the lab environment for 15 days.

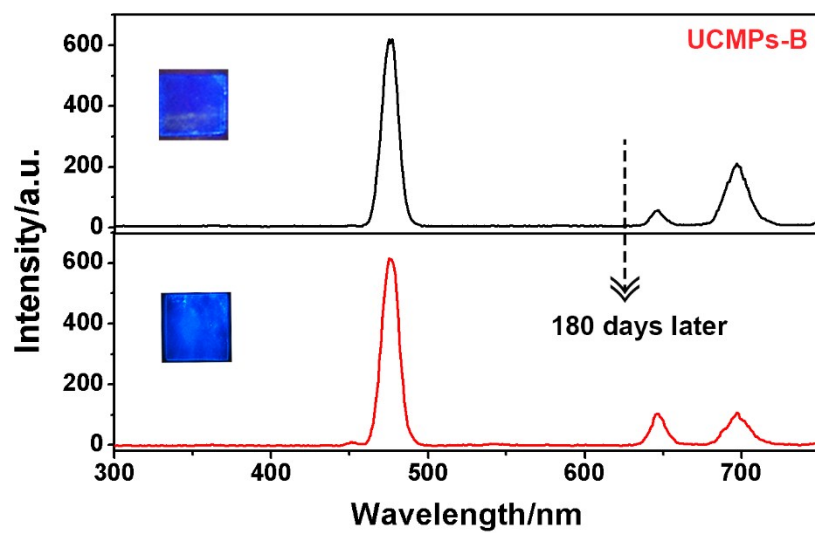

**Figure S4** Upconversion fluorescence intensity of UCMPs-B/PAA film (F6) before and after 180 days, respectively.

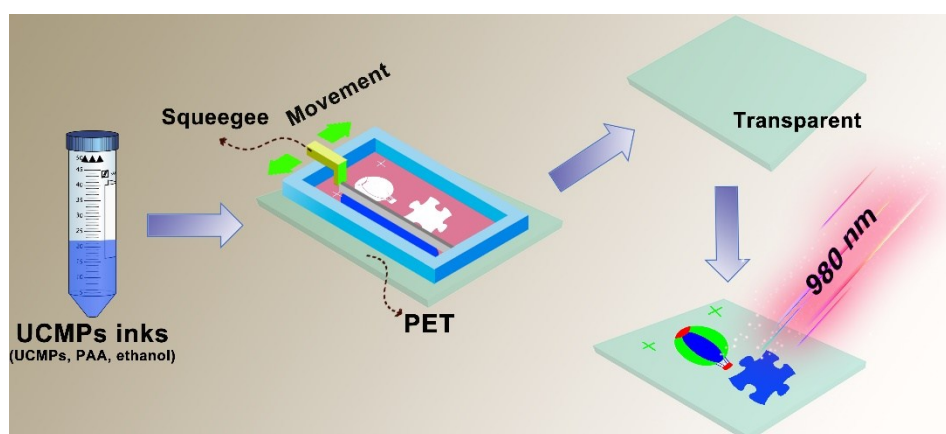

**Figure S5** schematic illustration of screen printing anti-counterfeiting patterns.

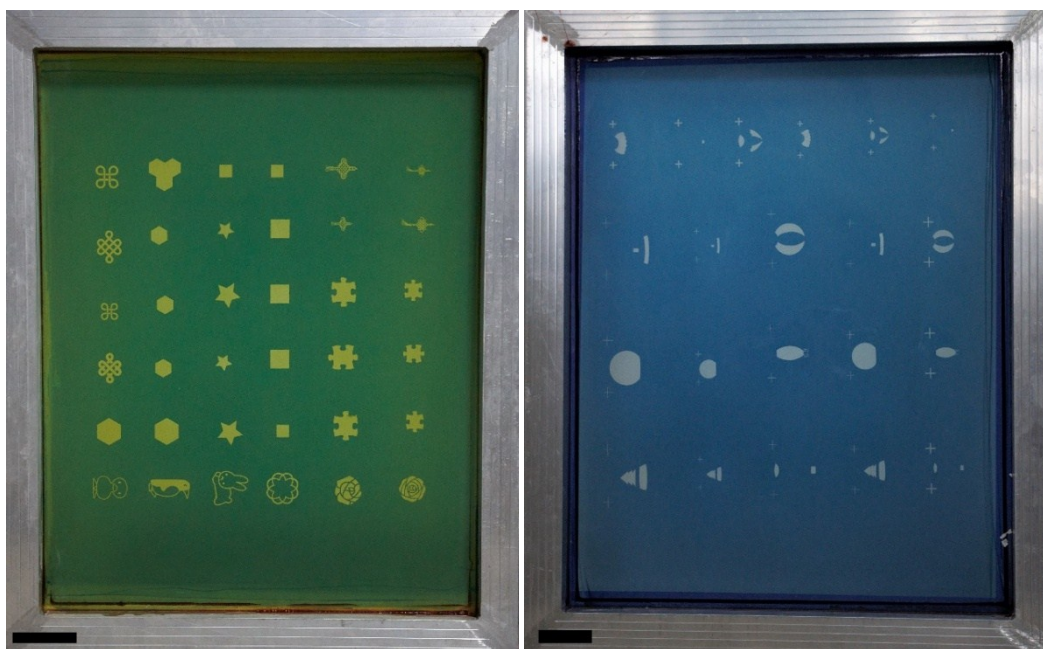

**Figure S6** The photograph of screen printing plates (scale bar is 5 cm).

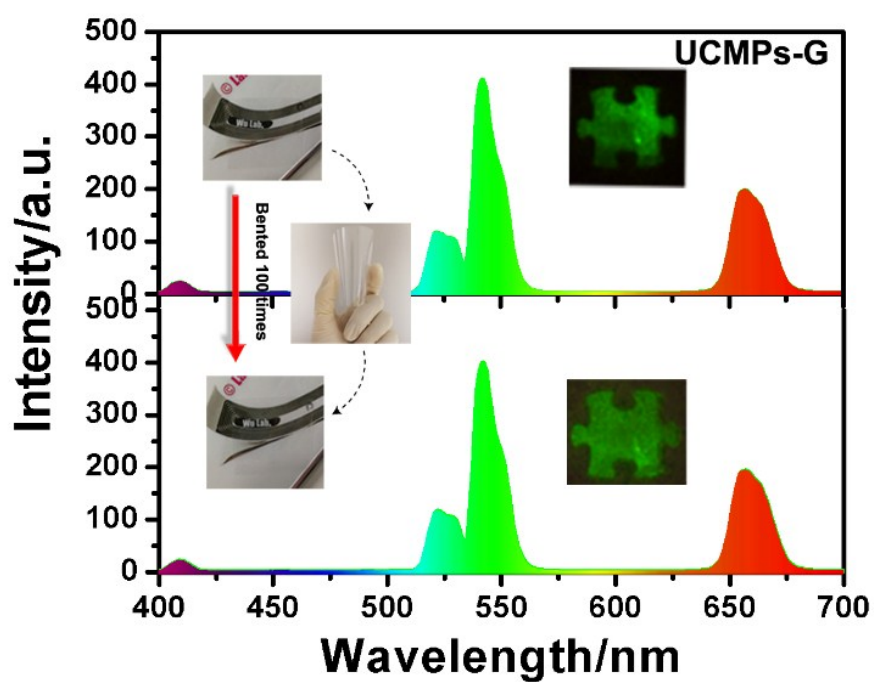

**Figure S7** Upconversion fluorescence intensity of UCMPs-G/PAA patterns before and after bending 100 times, respectively.

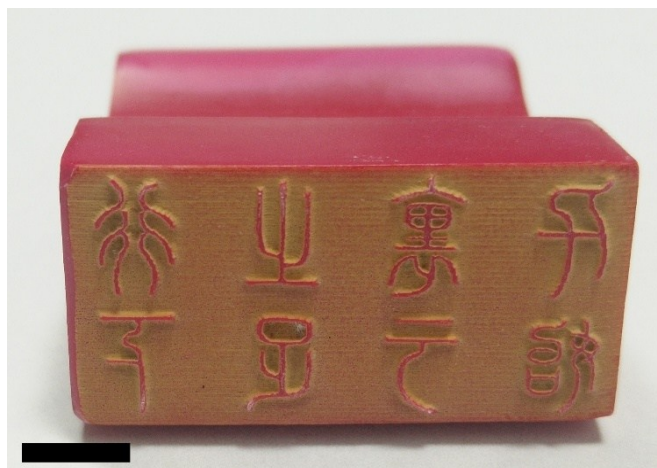

**Figure S8** The photograph of stamp (scale bar is 6 mm).
